# Supplementary material for: Confluence does not affect the expression of miR-375 and its direct targets in rat and human insulin-secreting cell lines
Source: PeerJ. 2017 Jun 28;5:e3503. doi: 10.7717/peerj.3503 (PMC5493031; doi:10.7717/peerj.3503)
Supplement: Table S1 [file peerj-05-3503-s003.xlsx]

## Sheet: miR-375
Supplemental Table S1. Average qPCR Ct values for each assay ran in duplicate or triplicate wells.
A. INS-1 832/13 miR-375
		Confluence
Trial	Target	0.2	0.6	0.8	1
1	miR-375	23.0246	22.4584	22.5978	22.5272
1	U87	23.4825	23.6006	23.4535	23.2798
2	miR-375	22.9722	22.9519	22.8734	22.4996
2	U87	23.5432	23.7429	23.419	23.357
3	miR-375	23.4267	22.5823	23.0248	22.5119
3	U87	23.9001	23.398	23.5511	23.0915
B. INS-1 832/13 miR-375 targets
		Confluence
Trial	Target	0.2	0.6	0.8	1
1	Aifm1	25.5178	26.3985	26.6995	26.5151
1	Cav1	31.1578	31.977	32.0777	32.2889
1	Hrpt1	23.9777	24.9755	24.9782	24.9807
1	Ppia1	19.1387	20.7996	20.1412	20.5454
2	Aifm1	26.8817	26.9396	26.565	26.3764
2	Cav1	32.3291	32.3636	31.747	31.9508
2	Hrpt1	25.4707	25.4884	24.7074	24.8041
2	Ppia1	20.5887	20.9484	20.0069	20.2744
3	Aifm1	26.481	26.5516	26.0907	26.2428
3	Cav1	32.1956	31.9109	31.3085	32.0715
3	Hrpt1	25.157	24.8884	24.4811	24.8137
3	Ppia1	20.3124	20.1243	19.8796	20.4475
C. EndoC BH1 miR-375
		Confluence
Trial	Target	0.2	0.6	0.8	1
1	miR-375	20.1562	19.7383	19.8293	19.5045
1	RNU44	23.8785	23.4094	23.5568	23.3879
1	RNU48	22.7296	22.5288	22.6398	22.5122
2	miR-375	*	19.7684	19.5021	19.5478
2	RNU44	*	23.7249	23.5078	23.6101
2	RNU48	*	22.6326	22.5639	22.3992
3	miR-375	20.0984	20.0165	19.7892	19.7658
3	RNU44	23.9727	23.7947	23.526	23.4978
3	RNU48	22.7791	22.7031	22.6141	22.5616
4	miR-375	20.2238	19.9296	19.856	19.767
4	RNU44	23.9863	23.7925	23.7627	23.6969
4	RNU48	22.9935	22.8054	22.5877	22.2651
*compromised assays
B. EndoC BH1 miR-375 targets
		Confluence
		0.2	0.6	0.8	1
1	AIFM1	25.9075	25.4113	25.5506	25.1308
1	CAV1	31.8635	31.4692	31.6446	31.4398
1	HPRT1	26.405	25.761	25.9655	25.6797
1	PPIA	26.2262	25.512	25.6616	25.3946
2	AIFM1	25.8887	25.4786	25.4873	25.3518
2	CAV1	32.032	31.7313	31.6392	31.8455
2	HPRT1	26.228	25.7365	25.6395	25.6565
2	PPIA	25.9136	25.1897	25.2731	25.3378
3	AIFM1	25.8505	25.6463	25.5844	25.5529
3	CAV1	31.734	31.8164	31.5562	31.4299
3	HPRT1	26.0064	25.9759	25.8267	25.7169
3	PPIA	26.1732	26.0056	25.9617	25.7442
4	AIFM1	25.9433	25.206	25.1913	25.3922
4	CAV1	31.7734	31.5146	31.625	31.6656
4	HPRT1	25.8005	25.6137	25.7991	25.9041
4	PPIA	26.1272	25.4722	25.6949	25.6237

## Sheet: Extra_miRs_INS1 83213 cells
INS-1 832/13
		Confluence
Trial	Target	0.2	0.6	0.8	1
1	miR-152	31.5345	31.0457	30.763	31.0605
1	miR-130a	28.5874	27.7646	27.4331	27.6472
1	miR-132	26.8282	27.0435	25.4261	25.3889
1	miR-212	29.1243	28.157	28.0383	27.7803
1	miR-200a	36.9317	35.0421	34.0257	35.2604
1	U87	21.2471	20.9371	20.7987	20.6527
2	miR-152	31.7707	31.5371	30.735	30.8132
2	miR-130a	28.391	28.0325	27.7144	27.5816
2	miR-132	26.5501	25.781	25.3569	24.9037
2	miR-212	28.9255	28.252	27.9528	27.5052
2	miR-200a	36.1346	36.0854	35.451	35.0682
2	U87	21.0593	20.8069	20.6288	20.4733
3	miR-152	30.9606	30.9816	30.1188	29.9644
3	miR-130a	28.1584	28.0231	27.8641	27.5928
3	miR-132	26.7365	26.1016	25.2339	24.7204
3	miR-212	29.2411	28.6445	27.7481	27.1546
3	miR-200a	35.7409	36.6425	35.9235	35.8397
3	U87	21.1619	20.9275	20.467	20.243

## Sheet: Extra_miRs_EndoC BH1 cells
EndoC BH1
		Confluence
Trial	Target	0.2	0.6	0.8	1
1	miR-152	30.0625	28.8838	29.3049	29.1885
1	miR-130a	31.3719	29.9207	30.0356	29.7476
1	miR-132	24.3153	23.9096	23.696	23.6054
1	miR-212	28.14	27.9978	27.8016	27.6554
1	miR-200a	23.4262	22.6159	22.7264	22.5087
1	RNU44	23.2885	23.445	23.6512	23.5028
1	RNU48	22.4607	22.8939	23.1229	23.0441
2	miR-152	30.0682	29.4757	29.4614	29.6395
2	miR-130a	30.7081	29.796	29.9647	30.2345
2	miR-132	23.9443	24.062	24.0401	23.912
2	miR-212	27.9751	28.2587	27.9043	27.7566
2	miR-200a	23.605	22.8758	22.6431	22.7533
2	RNU44	23.9934	23.5957	23.1136	23.0181
2	RNU48	22.9973	23.0085	22.49	22.3547
3	miR-152	31.1396	29.7253	29.2783	29.3552
3	miR-130a	31.9928	30.9033	30.3454	30.1797
3	miR-132	24.9452	24.1876	23.7547	23.0731
3	miR-212	28.5903	28.0093	27.6285	26.8796
3	miR-200a	23.1654	22.7453	22.2991	21.9799
3	RNU44	23.5763	23.4417	23.0839	23.0445
3	RNU48	22.7826	22.9467	22.772	22.8611
4	miR-152	29.6516	29.6514	30.9055	30.6084
4	miR-130a	29.7071	29.6368	29.7747	32.6969
4	miR-132	23.8545	23.6262	23.6779	24.1089
4	miR-212	27.3768	27.1887	27.405	27.5518
4	miR-200a	22.1937	22.0049	21.982	24.7645
4	RNU44	23.2617	23.0898	22.6037	24.6777
4	RNU48	23.3628	22.8806	22.3015	23.0597
